# Supplementary material for: Role of mobile genetic elements in the global dissemination of the carbapenem resistance gene blaNDM
Source: PubMed Central journal article supplement (PMC8894482; doi:10.1038/s41467-022-28819-2), 2022-03-03
Supplement: 41467_2022_28819_MOESM4_ESM.pdf [file 41467_2022_28819_MOESM4_ESM.pdf]

**Title:** Supplementary Data 1.

**Description:** A table containing information about the blaNDM positive contigs analysed in this work. This includes corresponding sample accession numbers and other relevant information: instrument, organism, collection date, sampling location, sampling source, identified plasmid types and plasmid cluster, length, and GC content.

**Title:** Supplementary Data 2.

**Description:** A table containing information about the dataset of complete plasmid reference sequences. This includes accession numbers of complete plasmids, description, plasmid cluster, length, organism, collection date, isolation source and sampling location.

**Title:** Supplementary Data 3.

**Description:** XML configuration files used in BEAST2 molecular dating analysis.
